# Supplementary material
Source: Springer Nature journal article supplement (https://www.springermedizin.de/resource/supplementary/12957_2012_1163_MOESM4_ESM.pdf/9561584)

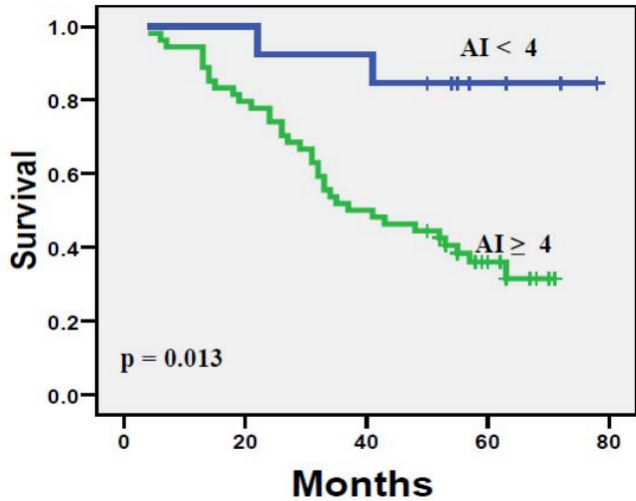

Supplement: MOESM4 [file 9561584]
